# Supplementary material
Source: Springer Nature journal article supplement (https://www.springermedizin.de/resource/supplementary/12891_2004_90_MOESM3_ESM.pdf/9510460)

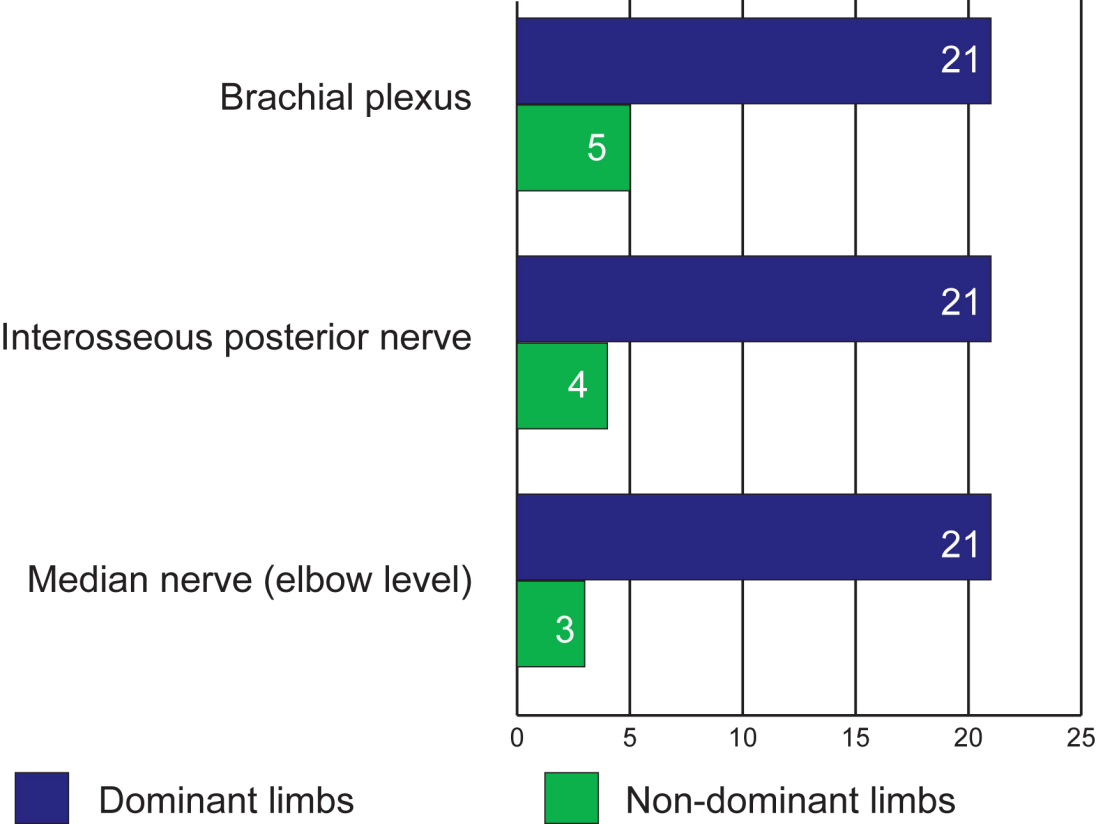

Supplement: MOESM3 [file 9510460]
